# Supplementary material
Source: PubMed Central journal article supplement (PMC5676454)
Supplement: NIHMS916647-supplement-Supporting_Info_Table1.pdf [file NIHMS916647-supplement-Supporting_Info_Table1.pdf]

| sample        | primary cScore | primary r2 | primary ec50 | primary ec50_l |
|---------------|----------------|------------|--------------|----------------|
| SJ000024224-2 | Inactive       | NA         | NA           | NA             |
| SJ000031311-2 | Inactive       | NA         | NA           | NA             |
| SJ000338276-2 | Inactive       | NA         | NA           | NA             |
| SJ000122872-2 | Inactive       | NA         | NA           | NA             |
| SJ000460846-2 | Inactive       | NA         | NA           | NA             |
| SJ000251743-2 | Inactive       | NA         | NA           | NA             |
| SJ000049059-2 | Inactive       | NA         | NA           | NA             |
| SJ000338514-2 | Inverse        | 0.92       | -3.823908741 | -4.013228266   |
| SJ000184291-2 | Inverse        | 0.97       | -3.537602002 | -3.721246399   |
| SJ000518754-2 | Inverse        | 0.86       | -3.48148606  | -3.958607315   |
| SJ000007551-2 | Inverse        | 0.74       | -3.420216403 | -4             |
| SJ000208458-2 | Inverse        | 0.64       | -3.292429824 | -3.920818754   |
| SJ000517298-2 | Inverse        | 0.8        | -3.537602002 | -3.958607315   |
| SJ000337803-2 | Inverse        | 0.24       | -3.22184875  | -4.096910013   |
| SJ000292370-3 | Inverse        | 0.67       | -3.356547324 | -4.055517328   |
| SJ000161809-3 | Inverse        | 0.57       | -3.366531544 | -4             |
| SJ000124514-2 | Inverse        | -2.20E-16  | -6.721246399 | -10.14874165   |
| SJ000081990-2 | Inverse        | 0.4        | -4.060480747 | -4.853871964   |
| SJ000097754-2 | Inverse        | 0.72       | -4.214670165 | -4.37675071    |
| SJ000369908-2 | Inverse        | 0.59       | -3.37675071  | -4             |
| SJ000108033-2 | Inverse        | 0.87       | -4.13667714  | -4.27572413    |
| SJ000304667-2 | Inverse        | 0.91       | -3.744727495 | -3.853871964   |
| SJ000516965-2 | Inverse        | 0.93       | -3.568636236 | -3.602059991   |
| SJ000151680-2 | Inverse        | 0.68       | -3.420216403 | -4.113509275   |
| SJ000184121-2 | Inverse        | 0.58       | -3.886056648 | -4.096910013   |
| SJ000291942-2 | Sigmoidal      | 0.98       | -6.619788758 | -6.853871964   |
| SJ000370178-2 | Sigmoidal      | 0.93       | -6           | -6.346787486   |
| SJ000063181-2 | Sigmoidal      | 0.85       | -7.443697499 | -7.795880017   |
| SJ000024045-2 | Sigmoidal      | 0.91       | -8.920818754 | -9.070581074   |
| SJ000029514-2 | Sigmoidal      | 0.97       | -8.301029996 | -8.443697499   |
| SJ000026852-2 | Sigmoidal      | 0.94       | -8.173925197 | -8.356547324   |
| SJ000298151-2 | Sigmoidal      | 0.93       | -7.958607315 | -8.13667714    |
| SJ000340178-2 | Sigmoidal      | 0.92       | -7.853871964 | -8.022276395   |
| SJ000293035-2 | Sigmoidal      | 0.96       | -7.823908741 | -7.958607315   |
| SJ000055839-2 | Sigmoidal      | 0.91       | -7.744727495 | -7.920818754   |
| SJ000063028-2 | Sigmoidal      | 0.91       | -7.619788758 | -7.769551079   |
| SJ000031471-2 | Sigmoidal      | 0.94       | -7.585026652 | -7.744727495   |
| SJ000207974-2 | Sigmoidal      | 0.93       | -7.327902142 | -7.48148606    |
| SJ000208514-2 | Sigmoidal      | 0.95       | -7.292429824 | -7.468521083   |
| SJ000045485-2 | Sigmoidal      | 0.99       | -7.207608311 | -7.292429824   |
| SJ000063138-2 | Sigmoidal      | 0.92       | -7.070581074 | -7.200659451   |
| SJ000354312-2 | Sigmoidal      | 0.96       | -7.060480747 | -7.229147988   |
| SJ000017426-3 | Sigmoidal      | 0.96       | -6.958607315 | -7.173925197   |

|               |           |      |              |              |
|---------------|-----------|------|--------------|--------------|
| SJ000062591-2 | Sigmoidal | 0.93 | -6.886056648 | -7.036212173 |
| SJ000162243-3 | Sigmoidal | 0.94 | -6.795880017 | -6.886056648 |
| SJ000367650-2 | Sigmoidal | 0.9  | -6.769551079 | -6.958607315 |
| SJ000063180-2 | Sigmoidal | 0.94 | -6.769551079 | -7           |
| SJ000154298-2 | Sigmoidal | 0.91 | -6.744727495 | -7.13667714  |
| SJ000062600-2 | Sigmoidal | 0.95 | -6.568636236 | -6.744727495 |
| SJ000370379-2 | Sigmoidal | 0.95 | -6.552841969 | -6.769551079 |
| SJ000444978-2 | Sigmoidal | 0.95 | -6.537602002 | -6.677780705 |
| SJ000316928-2 | Sigmoidal | 0.92 | -6.508638306 | -6.721246399 |
| SJ000295844-2 | Sigmoidal | -1.5 | -8.853871964 | -44.02687215 |
| SJ000121199-2 | Sigmoidal | 0.81 | -8.494850022 | -8.744727495 |
| SJ000338565-2 | Sigmoidal | 0.82 | -8.193820026 | -8.431798276 |
| SJ000056835-2 | Sigmoidal | 0.9  | -8.148741651 | -8.30980392  |
| SJ000124445-2 | Sigmoidal | 0.9  | -8           | -8.200659451 |
| SJ000143378-2 | Sigmoidal | 0.74 | -7.958607315 | -8.27572413  |
| SJ000063040-2 | Sigmoidal | 0.85 | -7.920818754 | -8.102372909 |
| SJ000518716-2 | Sigmoidal | 0.89 | -7.886056648 | -8.15490196  |
| SJ000294921-2 | Sigmoidal | 0.83 | -7.853871964 | -8.107905397 |
| SJ000394353-2 | Sigmoidal | 0.83 | -7.795880017 | -7.886056648 |
| SJ000208831-2 | Sigmoidal | 0.83 | -7.698970004 | -7.958607315 |
| SJ000007707-2 | Sigmoidal | 0.8  | -7.552841969 | -7.958607315 |
| SJ000045486-2 | Sigmoidal | 0.88 | -7.508638306 | -7.769551079 |
| SJ000139983-2 | Sigmoidal | 0.87 | -7.431798276 | -7.677780705 |
| SJ000441894-2 | Sigmoidal | 0.82 | -7.408935393 | -7.585026652 |
| SJ000161544-3 | Sigmoidal | 0.86 | -7.408935393 | -7.744727495 |
| SJ000390741-2 | Sigmoidal | 0.81 | -7           | -7.327902142 |
| SJ000451891-2 | Sigmoidal | 0.74 | -6.958607315 | -7.292429824 |
| SJ000294743-2 | Sigmoidal | 0.87 | -6.886056648 | -7.494850022 |
| SJ000208133-2 | Sigmoidal | 0.88 | -6.638272164 | -6.769551079 |
| SJ000414020-2 | Sigmoidal | 0.86 | -3.744727495 | -4.075720714 |
| SJ000421218-2 | Sigmoidal | 0.7  | -3.744727495 | -4.167491087 |
| SJ000063022-2 | Sigmoidal | 0.8  | -3.677780705 | -4.22184875  |
| SJ000339592-2 | Sigmoidal | 0.92 | -8.050609993 | -8.161150909 |
| SJ000013778-2 | Sigmoidal | 0.93 | -7.823908741 | -7.958607315 |
| SJ000296667-2 | Sigmoidal | 0.91 | -7.214670165 | -7.455931956 |
| SJ000293006-2 | Sigmoidal | 0.93 | -7.207608311 | -7.508638306 |
| SJ000433644-2 | Sigmoidal | 0.91 | -6.823908741 | -7.075720714 |
| SJ000368630-2 | Sigmoidal | 0.96 | -5.958607315 | -6.13667714  |
| SJ000007499-2 | Sigmoidal | 0.83 | -8.346787486 | -8.619788758 |
| SJ000154959-2 | Sigmoidal | 0.78 | -8.096910013 | -8.397940009 |
| SJ000297687-2 | Sigmoidal | 0.86 | -8.091514981 | -8.292429824 |
| SJ000290800-2 | Sigmoidal | 0.83 | -7.823908741 | -8.119186408 |
| SJ000121296-3 | Sigmoidal | 0.84 | -7.795880017 | -8.031517051 |
| SJ000207559-2 | Sigmoidal | 0.9  | -7.200659451 | -7.443697499 |

|               |              |    |    |    |
|---------------|--------------|----|----|----|
| SJ000105009-2 | Single-Point | NA | NA | NA |
| SJ000449712-2 | Single-Point | NA | NA | NA |
| SJ000106942-2 | Single-Point | NA | NA | NA |
| SJ000338685-2 | Single-Point | NA | NA | NA |
| SJ000195722-2 | Single-Point | NA | NA | NA |
| SJ000208919-2 | Single-Point | NA | NA | NA |
| SJ000339517-2 | Super Active | NA | -9 | NA |
| SJ000294876-2 | Super Active | NA | -9 | NA |
| SJ000157784-2 | Super Active | NA | -9 | NA |
| SJ000338428-2 | Super Active | NA | -9 | NA |
| SJ000286673-2 | Supplement   | NA | NA | NA |
| SJ000287098-9 | Supplement   | NA | NA | NA |
| SJ000286237-8 | Supplement   | NA | NA | NA |
| SJ000821588-2 | Supplement   | NA | NA | NA |

| primary ec50_u | zebrafish_assay @1uM | supplier   | supplierID  |
|----------------|----------------------|------------|-------------|
| NA             | inactive             | CHEMBRIDGE | 5570428     |
| NA             | inactive             | CHEMDIV    | 4789-3815   |
| NA             | inactive             | CHEMBRIDGE | 9034936     |
| NA             | inactive             | CHEMBRIDGE | 5699405     |
| NA             | inactive             | ENAMINE    | Z1003723306 |
| NA             | inactive             | CHEMDIV    | K405-3423   |
| NA             | inactive             | CHEMDIV    | 8005-8705   |
| -3.552841969   | inactive             | CHEMBRIDGE | 9040360     |
| -3.366531544   | inactive             | CHEMBRIDGE | 7376081     |
| -3.48148606    | inactive             | CHEMBRIDGE | 14235531    |
| -3.420216403   | inactive             | CHEMDIV    | 2043-2122   |
| -3.301029996   | inactive             | CHEMBRIDGE | 9016978     |
| -3.318758763   | inactive             | CHEMBRIDGE | 91560538    |
| -3.22184875    | inactive             | CHEMBRIDGE | 7985706     |
| -3.356547324   | inactive             | CHEMBRIDGE | 5246216     |
| -3.207608311   | inactive             | CHEMBRIDGE | 6201133     |
| -4.124938737   | inactive             | CHEMDIV    | C226-0962   |
| -4.060480747   | inactive             | CHEMDIV    | C720-0233   |
| -3.721246399   | inactive             | CHEMDIV    | E141-0526   |
| -3.193820026   | inactive             | ENAMINE    | Z19456130   |
| -3.958607315   | inactive             | CHEMDIV    | E722-1335   |
| -3.602059991   | toxic                | CHEMBRIDGE | 51137717    |
| -3.508638306   | toxic                | CHEMBRIDGE | 91880890    |
| -3.420216403   | toxic                | CHEMBRIDGE | 5691489     |
| -3.522878745   | toxic                | CHEMBRIDGE | 7367629     |
| -6.30980392    | active               | CHEMBRIDGE | 6204620     |
| -5.744727495   | active               | ENAMINE    | Z19757816   |
| -7.017728767   | active               | CHEMDIV    | C226-3140   |
| -8.769551079   | inactive             | CHEMBRIDGE | 5935313     |
| -8.173925197   | inactive             | CHEMDIV    | 4530-7241   |
| -8             | inactive             | CHEMDIV    | 4340-0686   |
| -7.795880017   | inactive             | CHEMBRIDGE | 5347647     |
| -7.619788758   | inactive             | CHEMBRIDGE | 9091914     |
| -7.698970004   | inactive             | CHEMBRIDGE | 6073715     |
| -7.522878745   | inactive             | CHEMDIV    | 8016-2491   |
| -7.537602002   | inactive             | CHEMDIV    | C226-2456   |
| -7.397940009   | inactive             | CHEMDIV    | 4813-0675   |
| -7.187086643   | inactive             | CHEMBRIDGE | 9013027     |
| -7.13076828    | inactive             | CHEMBRIDGE | 9017637     |
| -7.124938737   | inactive             | CHEMDIV    | 7610-2363   |
| -6.920818754   | inactive             | CHEMDIV    | C226-3024   |
| -6.920818754   | inactive             | CHEMBRIDGE | 62726111    |
| -6.744727495   | inactive             | CHEMBRIDGE | 5245599     |

|              |          |            |             |
|--------------|----------|------------|-------------|
| -6.769551079 | inactive | CHEMDIV    | C226-0235   |
| -6.638272164 | inactive | CHEMBRIDGE | 6224143     |
| -6.619788758 | inactive | ENAMINE    | Z1106665833 |
| -6.522878745 | inactive | CHEMDIV    | C226-3138   |
| -6.124938737 | inactive | CHEMBRIDGE | 5813384     |
| -6.408935393 | inactive | CHEMDIV    | C226-0252   |
| -6.102372909 | inactive | ENAMINE    | Z1106859828 |
| -6.337242168 | inactive | ENAMINE    | Z145341032  |
| -6.086186148 | inactive | CHEMDIV    | F264-0031   |
| -4.602059991 | inactive | CHEMBRIDGE | 5255387     |
| -8.22184875  | inactive | CHEMBRIDGE | 5701537     |
| -8           | inactive | CHEMBRIDGE | 9083529     |
| -7.958607315 | inactive | CHEMDIV    | 8017-9848   |
| -7.744727495 | inactive | CHEMDIV    | C226-0392   |
| -7.602059991 | inactive | CHEMBRIDGE | 5265701     |
| -7.657577319 | inactive | CHEMDIV    | C226-2476   |
| -7.508638306 | inactive | CHEMBRIDGE | 79722939    |
| -7.602059991 | inactive | CHEMBRIDGE | 6097929     |
| -7.602059991 | inactive | ENAMINE    | Z18373059   |
| -7.346787486 | inactive | CHEMBRIDGE | 9020985     |
| -7.065501549 | inactive | CHEMDIV    | 2054-0030   |
| -7.086186148 | inactive | CHEMDIV    | 7610-2364   |
| -7.200659451 | inactive | CHEMBRIDGE | 7977589     |
| -6.958607315 | inactive | ENAMINE    | Z281772932  |
| -7.008773924 | inactive | CHEMBRIDGE | 6188444     |
| -6.366531544 | inactive | ENAMINE    | Z1106859880 |
| -6.420216403 | inactive | ENAMINE    | Z1037584322 |
| -6.193820026 | inactive | CHEMBRIDGE | 5220999     |
| -6.251811973 | inactive | CHEMBRIDGE | 9014002     |
| -3.744727495 | inactive | ENAMINE    | Z111906406  |
| -3.744727495 | inactive | ENAMINE    | Z19758643   |
| -3.698970004 | inactive | CHEMDIV    | C226-2442   |
| -7.920818754 | toxic    | CHEMBRIDGE | 9085609     |
| -7.721246399 | toxic    | CHEMDIV    | 3156-0424   |
| -6.920818754 | toxic    | CHEMBRIDGE | 5307485     |
| -6.744727495 | toxic    | CHEMBRIDGE | 6233047     |
| -6.657577319 | toxic    | ENAMINE    | Z1171615156 |
| -5.744727495 | toxic    | ENAMINE    | Z104483252  |
| -8.107905397 | toxic    | CHEMDIV    | 2042-2748   |
| -7.769551079 | toxic    | CHEMBRIDGE | 5853438     |
| -7.886056648 | toxic    | CHEMBRIDGE | 5331317     |
| -7.431798276 | toxic    | CHEMBRIDGE | 5142125     |
| -7.552841969 | toxic    | CHEMDIV    | 1000-0399   |
| -7.013228266 | toxic    | CHEMBRIDGE | 9010587     |

|    |          |             |            |
|----|----------|-------------|------------|
| NA | inactive | CHEMDIV     | E596-0010  |
| NA | inactive | ENAMINE     | Z101340260 |
| NA | inactive | CHEMDIV     | E676-2829  |
| NA | inactive | CHEMBRIDGE  | 9083857    |
| NA | inactive | CHEMBRIDGE  | 7848005    |
| NA | inactive | CHEMBRIDGE  | 9022135    |
| NA | inactive | CHEMBRIDGE  | 9087412    |
| NA | inactive | CHEMBRIDGE  | 6028799    |
| NA | inactive | CHEMBRIDGE  | 6021190    |
| NA | inactive | CHEMBRIDGE  | 9035557    |
| NA | toxic    | CAYMAN      | 10739      |
| NA | inactive | SELLECK     | S2380      |
| NA | inactive | SANTA_CRUZ  | sc-3529    |
| NA | inactive | TCI_AMERICA | H0955      |

| molsmiles                                                                                                                              |
|----------------------------------------------------------------------------------------------------------------------------------------|
| <chem>Fc1ccc(cc1)C(=O)N2CCN(CC2)c3ccccc3;Fc1ccc(cc1)C(=O)N2CCN(CC2)c3ccccc3</chem>                                                     |
| <chem>CCN(CC)CCCNc1ncnc2sc3CC(C)CCc3c12;CCN(CC)CCCNc1ncnc2sc3CC(C)CCc3c12</chem>                                                       |
| <chem>CCC1CCc2nc3sc(C(=O)O)c(N)c3cc2C1;CCC1CCc2nc3sc(C(=O)O)c(N)c3cc2C1</chem>                                                         |
| <chem>NC(=O)c1ccccc1NS(=O)(=O)c2cc(Cl)ccc2Cl;NC(=O)c1ccccc1NS(=O)(=O)c2cc(Cl)ccc2Cl</chem>                                             |
| <chem>Fc1ccccc1NC(=O)CCN2C=Nc3scc(c4ccc(Br)cc4)c3C2=O;Fc1ccccc1NC(=O)CCN2C=Nc3scc(c4ccc(Br)cc4)c3C2=O</chem>                           |
| <chem>Cc1ccc(Cl)cc1n2ncc3c(NCCO)ncnc23;Cc1ccc(Cl)cc1n2ncc3c(NCCO)ncnc23</chem>                                                         |
| <chem>O=C(Nc1ccccc1C#N)c2cccs2;O=C(Nc1ccccc1C#N)c2cccs2</chem>                                                                         |
| <chem>CCC1CCc2nc3sc(C(=O)C)c(N)c3cc2C1;CCC1CCc2nc3sc(C(=O)C)c(N)c3cc2C1</chem>                                                         |
| <chem>CC1CCN(CC1)c2ncnc3c2cnn3c4ccc(Cl)cc4;CC1CCN(CC1)c2ncnc3c2cnn3c4ccc(Cl)cc4</chem>                                                 |
| <chem>Cc1csc2c(ncnc12)c3ccc4OCCOc4c3;Cc1csc2c(ncnc12)c3ccc4OCCOc4c3</chem>                                                             |
| <chem>Fc1ccc(NC(=O)c2sc3ccccc3c2Cl)c(F)c1;Fc1ccc(NC(=O)c2sc3ccccc3c2Cl)c(F)c1</chem>                                                   |
| <chem>Fc1ccccc1c2onc(n2)c3ccc4OCOc4c3;Fc1ccccc1c2onc(n2)c3ccc4OCOc4c3</chem>                                                           |
| <chem>Nc1nc(NCc2ccccc2)nc(n1)c3cnc4ccccc4c3;Nc1nc(NCc2ccccc2)nc(n1)c3cnc4ccccc4c3</chem>                                               |
| <chem>CCOC(=O)c1sc2nc3ccc(OC)cc3cc2c1N;CCOC(=O)c1sc2nc3ccc(OC)cc3cc2c1N</chem>                                                         |
| <chem>O=C(Nc1nc2ccccc2s1)c3ccc(cc3)c4ccccc4;O=C(Nc1nc2ccccc2s1)c3ccc(cc3)c4ccccc4</chem>                                               |
| <chem>Cc1ccc(OCC(=O)Nc2ccc(Cl)cn2)c(C)c1;Cc1ccc(OCC(=O)Nc2ccc(Cl)cn2)c(C)c1</chem>                                                     |
| <chem>COc1ccccc1c2onc(c2)C(=O)Nc3ccccc(Cl)c3;COc1ccccc1c2onc(c2)C(=O)Nc3ccccc(Cl)c3</chem>                                             |
| <chem>CC1=CC2=NC=C(C(=O)Nc3ccc(C)c(C)c3)C(=O)N2C=C1;CC1=CC2=NC=C(C(=O)Nc3ccc(C)c(C)c3)C(=O)N2C=C1</chem>                               |
| <chem>Cc1c(nnn1c2ccc(Br)cc2)C(=O)Nc3ccccc3;Cc1c(nnn1c2ccc(Br)cc2)C(=O)Nc3ccccc3</chem>                                                 |
| <chem>Clc1ccccc1CSc2oc(nn2)c3ccc4OCOc4c3;Clc1ccccc1CSc2oc(nn2)c3ccc4OCOc4c3</chem>                                                     |
| <chem>Cc1ccc(NC(=O)C2=Cc3sc(C)c(C)c3CS2)cc1C;Cc1ccc(NC(=O)C2=Cc3sc(C)c(C)c3CS2)cc1C</chem>                                             |
| <chem>COc1ccccc1[C@@H](C)NC(=O)C2=CN(C=C(C(=O)NCC(C)C)C2=O)C3CCCC3;COc1ccccc1[C@@H](C)NC(=O)C2=CN(C=C(C(=O)NCC(C)C)C2=O)C3CCCC3</chem> |
| <chem>COc1cc(nc(N)n1)c2cccc(OC(C)C)c2;COc1cc(nc(N)n1)c2cccc(OC(C)C)c2</chem>                                                           |
| <chem>Cc1cn2cc(nc2s1)c3ccc(l)cc3;Cc1cn2cc(nc2s1)c3ccc(l)cc3</chem>                                                                     |
| <chem>CC(C)(C)c1ccc(cc1Br)C(=O)N2CCc3ccccc23;CC(C)(C)c1ccc(cc1Br)C(=O)N2CCc3ccccc23</chem>                                             |
| <chem>CCc1ccc(OCC(=O)Nc2ccc(F)c(c2)[N+](=O)[O-])cc1;CCc1ccc(OCC(=O)Nc2ccc(F)c(c2)[N+](=O)[O-])cc1</chem>                               |
| <chem>Cc1ccsc1C(=O)OCC(=O)Nc2ccc(OC(F)F)cc2;Cc1ccsc1C(=O)OCC(=O)Nc2ccc(OC(F)F)cc2</chem>                                               |
| <chem>CC(C)Cc1onc(c1)C(=O)Nc2ccc(F)c(Cl)c2;CC(C)Cc1onc(c1)C(=O)Nc2ccc(F)c(Cl)c2</chem>                                                 |
| <chem>Clc1ccc(cc1)c2csc(Nc3ncccn3)n2;Clc1ccc(cc1)c2csc(Nc3ncccn3)n2</chem>                                                             |
| <chem>Cc1ccc(cc1)C(=O)C2=C(O)C(=O)N(C2c3ccc(F)cc3)c4nc5ccccc5s4;Cc1ccc(cc1)C(=O)C2=C(O)C(=O)N(C2c3ccc(F)cc3)c4nc5ccccc5s4</chem>       |
| <chem>COC(=O)c1sc(NC(=O)c2ccc(Cl)cc2)nc1C;COC(=O)c1sc(NC(=O)c2ccc(Cl)cc2)nc1C</chem>                                                   |
| <chem>Cc1ccc(cc1)C(=O)Nc2ccc(Cl)cc2C;Cc1ccc(cc1)C(=O)Nc2ccc(Cl)cc2C</chem>                                                             |
| <chem>COC(=O)c1sc(NC(=O)c2csc3ccccc23)nc1C;COC(=O)c1sc(NC(=O)c2csc3ccccc23)nc1C</chem>                                                 |
| <chem>Cc1ccccc1CNC(=O)CN(c2ccc(Oc3ccccc3)cc2)S(=O)(=O)C;Cc1ccccc1CNC(=O)CN(c2ccc(Oc3ccccc3)cc2)S(=O)(=O)C</chem>                       |
| <chem>Cc1ccccc1C(=O)Nc2nc3ccc(F)cc3s2;Cc1ccccc1C(=O)Nc2nc3ccc(F)cc3s2</chem>                                                           |
| <chem>Oc1ccccc1c2onc(c2)C(=O)Nc3ccc(F)c(Cl)c3;Oc1ccccc1c2onc(c2)C(=O)Nc3ccc(F)c(Cl)c3</chem>                                           |
| <chem>[O-][N+](=O)c1ccc(cc1)c2noc(n2)c3ccc(Cl)cc3Cl;[O-][N+](=O)c1ccc(cc1)c2noc(n2)c3ccc(Cl)cc3Cl</chem>                               |
| <chem>Clc1ccccc1OCC(=O)Nc2ccc(Br)cn2;Clc1ccccc1OCC(=O)Nc2ccc(Br)cn2</chem>                                                             |
| <chem>COc1cc(ccc1OCc2ccc(Cl)c(Cl)c2)C(=O)N;COc1cc(ccc1OCc2ccc(Cl)c(Cl)c2)C(=O)N</chem>                                                 |
| <chem>CC1CCN(CC1)C(=O)c2cc(on2)c3ccc(C)cc3;CC1CCN(CC1)C(=O)c2cc(on2)c3ccc(C)cc3</chem>                                                 |
| <chem>CCCc1onc(c1)C(=O)Nc2ccc(CC)cc2;CCCc1onc(c1)C(=O)Nc2ccc(CC)cc2</chem>                                                             |
| <chem>COC(=O)CCNC(=O)c1csc2nc(cn12)c3ccccc3Cl;COC(=O)CCNC(=O)c1csc2nc(cn12)c3ccccc3Cl</chem>                                           |
| <chem>Cc1ccc(NC(=O)c2cccs2)cc1C;Cc1ccc(NC(=O)c2cccs2)cc1C</chem>                                                                       |

|                                                                                                                 |
|-----------------------------------------------------------------------------------------------------------------|
| CC1CCN(CC1)C(=O)c2cc(on2)c3ccc(F)cc3;CC1CCN(CC1)C(=O)c2cc(on2)c3ccc(F)cc3                                       |
| Cc1ccc(NC(=O)CN(c2ccc(Oc3ccccc3)cc2)S(=O)(=O)C)cc1;Cc1ccc(NC(=O)CN(c2ccc(Oc3ccccc3)cc2)S(=O)(=O)C)cc1           |
| O=C(NC1CCCCC1)c2ccc(cc2)C#N;O=C(NC1CCCCC1)c2ccc(cc2)C#N                                                         |
| CCc1ccc(NC(=O)c2cc(CC(C)C)on2)cc1;CCc1ccc(NC(=O)c2cc(CC(C)C)on2)cc1                                             |
| Cc1ccnc1NC(=O)COc2ccc(Br)cc2;Cc1ccnc1NC(=O)COc2ccc(Br)cc2                                                       |
| CC1CCCN1C(=O)c2cc(on2)c3ccc(F)cc3;CC1CCCN1C(=O)c2cc(on2)c3ccc(F)cc3                                             |
| Fc1ccccc1OCC(=O)Nc2ccc3CCc3c2;Fc1ccccc1OCC(=O)Nc2ccc3CCc3c2                                                     |
| COc1ccc(cc1)c2nc(C)c(s2)C(=O)N3CCN(CC3)c4ccc(cc4)C(=O)C;COc1ccc(cc1)c2nc(C)c(s2)C(=O)N3CCN(CC3)c4ccc(cc4)C(=O)C |
| Cc1ccc(cc1)C2=CC(=O)c3cc(NC(=O)c4occc4)ccc3O2;Cc1ccc(cc1)C2=CC(=O)c3cc(NC(=O)c4occc4)ccc3O2                     |
| CC(=O)Nc1ccc2oc(nc2c1)c3ccc(Cl)cc3;CC(=O)Nc1ccc2oc(nc2c1)c3ccc(Cl)cc3                                           |
| CCOC(=O)c1sc(NC(=O)c2cccc(Cl)c2)nc1C;CCOC(=O)c1sc(NC(=O)c2cccc(Cl)c2)nc1C                                       |
| Fc1ccc(NC(=O)c2ccc(cc2)N3CCCC3)cc1;Fc1ccc(NC(=O)c2ccc(cc2)N3CCCC3)cc1                                           |
| CCc1ccc(NC(=O)c2sc3nc(C)C(C)C)c3c2N)cc1;CCc1ccc(NC(=O)c2sc3nc(C)C(C)C)c3c2N)cc1                                 |
| Clc1ccc(cc1)c2onc(c2)C(=O)Nc3cccc(Cl)c3;Clc1ccc(cc1)c2onc(c2)C(=O)Nc3cccc(Cl)c3                                 |
| BrC1CCCC1NC(=O)c2ccc(cc2)c3ccccc3;BrC1CCCC1NC(=O)c2ccc(cc2)c3ccccc3                                             |
| CC(=O)c1cccc(NC(=O)c2cc(on2)c3ccccc3O)c1;CC(=O)c1cccc(NC(=O)c2cc(on2)c3ccccc3O)c1                               |
| CN(C)C(=O)c1cccc(c1)c2nc3ccc(Cl)cc3s2;CN(C)C(=O)c1cccc(c1)c2nc3ccc(Cl)cc3s2                                     |
| Clc1ccc(NC(=S)NC(=O)c2cccs2)c(Cl)c1;Clc1ccc(NC(=S)NC(=O)c2cccs2)c(Cl)c1                                         |
| Cc1ccc2nc(sc2c1)c3ccc(NC(=O)COC(=O)c4ccc(cc4)C#N)cc3;Cc1ccc2nc(sc2c1)c3ccc(NC(=O)COC(=O)c4ccc(cc4)C#N)cc3       |
| Cc1ccc(NC(=O)C(=O)c2c[nH]c3ccccc23)cc1C;Cc1ccc(NC(=O)C(=O)c2c[nH]c3ccccc23)cc1C                                 |
| CC(C)(C)c1ccc(cc1)C(=O)Nc2ccc(Cl)cc2Cl;CC(C)(C)c1ccc(cc1)C(=O)Nc2ccc(Cl)cc2Cl                                   |
| CC1CCCN1C(=O)c2cc(on2)c3ccc(C)cc3;CC1CCCN1C(=O)c2cc(on2)c3ccc(C)cc3                                             |
| CC(C)(C)c1ccc(cc1)C(=O)Nc2cccc(NC(=O)COc3ccccc3Cl)c2;CC(C)(C)c1ccc(cc1)C(=O)Nc2cccc(NC(=O)COc3ccccc3Cl)c2       |
| Clc1cc(ccc1OCc2cc(on2)c3ccccc3)C#N;Clc1cc(ccc1OCc2cc(on2)c3ccccc3)C#N                                           |
| CCOc1ccc(NC(=O)CN(c2ccc(Oc3ccccc3)cc2)S(=O)(=O)C)cc1;CCOc1ccc(NC(=O)CN(c2ccc(Oc3ccccc3)cc2)S(=O)(=O)C)cc1       |
| O=C(Nc1ccc2CCc2c1)c3ccc(cc3)C#N;O=C(Nc1ccc2CCc2c1)c3ccc(cc3)C#N                                                 |
| CCc1ccc(cc1)c2nc(NC3CC3)sc2C;CCc1ccc(cc1)c2nc(NC3CC3)sc2C                                                       |
| Fc1ccccc1C(=O)Nc2ccc(Cl)cc2Cl;Fc1ccccc1C(=O)Nc2ccc(Cl)cc2Cl                                                     |
| CCC(=O)NCc1ccc(cc1)c2oc3ccccc3n2;CCC(=O)NCc1ccc(cc1)c2oc3ccccc3n2                                               |
| CC(OC(=O)c1ccccc1O)C(=O)Nc2sccc2C#N;CC(OC(=O)c1ccccc1O)C(=O)Nc2sccc2C#N                                         |
| CC(=O)c1cccc(NC(=O)COC(=O)c2sccc2C)c1;CC(=O)c1cccc(NC(=O)COC(=O)c2sccc2C)c1                                     |
| Oc1ccccc1c2onc(c2)C(=O)NCC=C;Oc1ccccc1c2onc(c2)C(=O)NCC=C                                                       |
| Cc1ccc(s1)C(=O)Nc2ccc(Br)cn2;Cc1ccc(s1)C(=O)Nc2ccc(Br)cn2                                                       |
| COc1ccc(cc1Br)C(=O)Nc2ccc3OCCOc3c2;COc1ccc(cc1Br)C(=O)Nc2ccc3OCCOc3c2                                           |
| Clc1cccc(c1)C(=O)Nc2ccc(Br)cn2;Clc1cccc(c1)C(=O)Nc2ccc(Br)cn2                                                   |
| COc1cc(NC(=O)c2ccc(Cl)cc2Cl)cc(OC)c1;COc1cc(NC(=O)c2ccc(Cl)cc2Cl)cc(OC)c1                                       |
| Fc1ccc(F)c(c1)C(=O)Nc2ccc(cc2)c3nccs3;Fc1ccc(F)c(c1)C(=O)Nc2ccc(cc2)c3nccs3                                     |
| OC(=O)c1ccccc1NCCC2=CCCC2;OC(=O)c1ccccc1NCCC2=CCCC2                                                             |
| Fc1ccccc(c1)C(=O)Nc2nc3ccccc3s2;Fc1ccccc(c1)C(=O)Nc2nc3ccccc3s2                                                 |
| Fc1ccc(Cc2cnc(NC(=O)c3ccccc3)s2)cc1;Fc1ccc(Cc2cnc(NC(=O)c3ccccc3)s2)cc1                                         |
| COc1ccc(C)cc1NC(=O)COc2ccc(C)cc2Br;COc1ccc(C)cc1NC(=O)COc2ccc(C)cc2Br                                           |
| COc1ccc(cc1)C(=O)Nc2sc3CCCCc3c2C(=O)N;COc1ccc(cc1)C(=O)Nc2sc3CCCCc3c2C(=O)N                                     |
| Fc1ccccc1C(=O)Nc2sc3CCCCc3c2C#N;Fc1ccccc1C(=O)Nc2sc3CCCCc3c2C#N                                                 |
| CNC(=O)COc1ccccc1C(=O)Nc2ccc(cc2)c3ccccc3;CNC(=O)COc1ccccc1C(=O)Nc2ccc(cc2)c3ccccc3                             |



|                                                                                                                  |
|------------------------------------------------------------------------------------------------------------------|
| <chem>CN1C(=O)c2sccc2n3c(CCCC(=O)Nc4ccccc4)nnc13;CN1C(=O)c2sccc2n3c(CCCC(=O)Nc4ccccc4)nnc13</chem>               |
| <chem>COc1ccc(cc1C(=O)Nc2ccc3Cc4ccccc4c3c2)[N+](=O)[O-];COc1ccc(cc1C(=O)Nc2ccc3Cc4ccccc4c3c2)[N+](=O)[O-]</chem> |
| <chem>CCN(CC)CCN(C(=O)c1occc1)c2nc3ccc(C)cc3s2;CCN(CC)CCN(C(=O)c1occc1)c2nc3ccc(C)cc3s2</chem>                   |
| <chem>Cc1c(Cl)cccc1NC(=O)Cc2noc(n2)c3ccccc3Cl;Cc1c(Cl)cccc1NC(=O)Cc2noc(n2)c3ccccc3Cl</chem>                     |
| <chem>COc1c(C)cc(Br)cc1C(=O)Nc2cccc(F)c2;COc1c(C)cc(Br)cc1C(=O)Nc2cccc(F)c2</chem>                               |
| <chem>CC(C)Oc1cccc(c1)C(=O)N(C)c2ccccc2;CC(C)Oc1cccc(c1)C(=O)N(C)c2ccccc2</chem>                                 |
| <chem>Fc1ccc2c(Cl)c(sc2c1)C(=O)Nc3ccc(Cl)cn3;Fc1ccc2c(Cl)c(sc2c1)C(=O)Nc3ccc(Cl)cn3</chem>                       |
| <chem>CC(C)C(=O)Nc1ccc2oc(nc2c1)c3ccc(Cl)cc3;CC(C)C(=O)Nc1ccc2oc(nc2c1)c3ccc(Cl)cc3</chem>                       |
| <chem>CC(C)C(=O)Nc1ccc(cc1)c2oc3cc(C)c(C)cc3n2;CC(C)C(=O)Nc1ccc(cc1)c2oc3cc(C)c(C)cc3n2</chem>                   |
| <chem>CCC1CCc2nc3sc(C(=O)OC)c(N)c3cc2C1;CCC1CCc2nc3sc(C(=O)OC)c(N)c3cc2C1</chem>                                 |
| <chem>COc1ccc(cc1O)C2=CC(=O)c3c(O)cc(O)cc3O2</chem>                                                              |
| <chem>Oc1ccc(cc1)C2=CC(=O)c3c(O)cc(O)cc3O2</chem>                                                                |
| <chem>Oc1ccc(\C=C\C(=O)c2ccc(O)cc2O)cc1</chem>                                                                   |
| <chem>Oc1ccc(C=CC(=O)c2ccccc2)cc1</chem>                                                                         |

N(C=C(C(=O)NCC(C)C)C2=O)C3CCCC3

c4nc5cccc5s4

c4)C(=O)C

l)cc3

c2

;)cc1
